# Supplementary material
Source: PubMed Central journal article supplement (PMC9845027)
Supplement: NIHMS1863872-supplement-Supporting_Information.pdf [file NIHMS1863872-supplement-Supporting_Information.pdf]

## Supporting Information

### Structural Analysis of Class I Lanthipeptides from *Pedobacter lusitanus* NL19 Reveals an Unusual Ring Pattern

Ian R. Bothwell<sup>1,§</sup>, Tânia Caetano<sup>2,§</sup>, Raymond Sarkisian<sup>1</sup>, Sónia Mendo<sup>2</sup> and Wilfred A. van der Donk<sup>1</sup>

<sup>1</sup> Howard Hughes Medical Institute and Department of Chemistry, University of Illinois at Urbana-Champaign, 600 South Mathews Ave, Urbana, IL 61822

<sup>2</sup> Molecular Biotechnology Laboratory, Department of Biology and CESAM, Campus de Santiago, University of Aveiro, 3810-189 Aveiro, Portugal

§ These authors contributed equally to this work

#### Supplemental Methods:

**General methods.** Reagents, buffer components and media were purchased from MilliporeSigma (Burlington, MA) or Fischer Scientific (Hampton, NH) unless otherwise noted. Oligonucleotides, enzymes, and buffers used for molecular biology were purchased from Integrated DNA Technologies Inc. (Coralville, IA) or New England Biolabs (Ipswich, MA). Plasmid isolation was conducted using QIAprep spin columns according to the manufacturer protocol (Qiagen, DE). Sequencing services were procured through ACGT Inc. (Wheeling, IL). *E. coli* NEB®5-alpha was used for cloning, selection and plasmid propagation, while *E. coli* BL21 Star (DE3) was used for peptide expression.

**Plasmid construction.** The plasmids constructed for this study are listed in Table S1 and their combined application for PedA15 production and purification is shown in Figure S1. The genes (*pedA15.1*, *pedA15.2*, *pedB15*, *pedC15* and *pedGluRS*) were amplified from total DNA purified from *P. lusitanus* NL19 with the NZYProof DNA polymerase (NZYTech), according to the manufacturer's recommendations, and using primers possessing the required restriction sites (Tables S1 and S2). *pedA15.1* and *pedA15.2* were cloned to encode His<sub>6</sub>-PedA15.1 and His<sub>6</sub>-PedA15.2 fusion peptides. The recipient vectors (pETDuet-1, pRSFDuet-1, pCDFDuet-1 and pACYCDuet-1) were purified with the NZYMiniprep kit (NZYTech). PCR products and vectors were digested with the appropriate FastDigest restriction enzymes (Thermo Fisher Scientific) (Table S1) for 1 h at 37 °C and separated by agarose gel electrophoresis. The digested PCR products and vectors were excised and purified from the gels with the NZYGelPure kit (NZYTech). Ligation was performed in a 20 µL reaction containing 50 ng of the vector, the insert at a molar ratio vector:insert of 1:3, 1 U of T4 DNA ligase (Thermo Fisher Scientific) and 1X T4 DNA ligase buffer. After 1 h, 5 µL of the ligation were used to transform *E. coli* NZY5α cells (NZYTech) and colonies were selected on LB agar plates supplemented with 50 µg/mL of ampicillin (pETDuet-1), 30 µg/mL of kanamycin (pRSFDuet-1), 34 µg/mL of chloramphenicol (pCDFDuet-1) or 50 µg/mL of streptomycin (pACYCDuet-1). Colonies with the desired plasmid were screened by colony-PCR with NZyTaq (NZYTech) and using the universal primers described for MCS-1 (pET Upstream Primer or pACYCDuetUP1 and DuetDOWN-1) or MCS-2 (DuetUP2 and T7 Term), following the manufacturer's recommendations. Positive colonies were selected for plasmid extraction and their MCS were sequenced (StabVida). pPedA15.1 and pPedA15.2 plasmids were used as vectors to construct pPedAC15.1 and pPedAC15.2 coexpression plasmids, respectively, according to the abovementioned protocol. The pPedGluRS/tRNA<sup>Glu</sup> plasmid was obtained by Gibson assembly reaction containing the

PCR-linearized vector pCDFDuet-1 and two gBlocks (IDT) encoding the tRNA<sup>Glu</sup> gene of *P. lusitanus* NL19. pCDFDuet-1 was linearized by PCR with the primers listed in Table S2 with the Phusion DNA polymerase (NEB), following the manufacturer's instructions, and purified with the QIAquick PCR purification kit (Qiagen). The two gBlocks were designed to encode the tRNA<sup>Glu</sup> of *P. lusitanus* NL19 gene under the transcriptional control of a T7 promoter sequence and containing flanking regions compatible to the Gibson assembly procedure<sup>1</sup> (to allow 5'-end and 3'-end overlap). The reaction was performed in the following conditions: 50 ng of linearized pCDFDuet-1, 2 ng of each gBlock and 1X Gibson Master Mix, in a total volume of 20  $\mu$ L. The reaction was incubated at 50 °C for 1 h and used to transform *E. coli* 5-alpha cells (NEB). Positive clones were selected after overnight incubation at 37 °C in LB agar plates supplemented with 34  $\mu$ g/mL of chloramphenicol and screened by colony-PCR with the MCS-1 primers as above described. After plasmid extraction and confirmation of correct gBlock insertion and sequence by Sanger sequencing, pPedtRNA<sup>Glu</sup> was used as cloning vector to express the *gluRS* gene of *P. lusitanus* NL19 in its MCS-2, as described above.

**Site-directed mutagenesis of PedA15 peptides.** PedA15.1 Ser-to-Ala variants were obtained by site directed mutagenesis of pPedA15.1 with the primers listed in Table S2. The reaction was performed according to the protocol described in reference<sup>2</sup> using the NZYProof DNA polymerase (NZYTech), followed by *DpnI* treatment (Thermo Fisher Scientific) and transformation of *E. coli* NZY5 $\alpha$  cells (NZYTech). Three Amp<sup>R</sup> colonies were selected for plasmid purification and sequencing to confirm the presence of the target mutation in *pedA15.1*.

PedA15.1 Ser-to-Thr variants were generated by PCR using primers listed in Table S2. PCR reactions (50  $\mu$ L) contained 1x Phusion HF buffer, 200  $\mu$ M dNTPs, 0.5  $\mu$ M forward and reverse primer, 10 ng pPedA15.1 template, and 1 U Phusion® DNA

polymerase. Thermocycler conditions were as follows: initial denaturation, 98 °C, 30 s; 30 cycles of denaturation (98 °C, 10 s), annealing ( $T_m + 5$  °C, 30 s), and extension (72 °C, 3 min); final extension, 72 °C, 4 min. Reactions were treated with *DpnI* to remove template and the product used to transform chemically competent *E. coli* NEB®5-alpha cells. Colonies were selected from LB agar containing ampicillin (Amp) at 37 °C overnight and propagated in liquid LB<sup>Amp</sup> at 37 °C overnight prior to plasmid isolation and sequencing.

**Heterologous expression of modified PedA and variants.** Electrocompetent *E. coli* BL21 Star (DE3) were transformed with combinations of the plasmids prepared (see Supplemental Information) to coexpress enzymes as described in the Results section. Colonies were selected on LB agar plates containing the appropriate antibiotics listed for each plasmid. Single colonies were used to inoculate 5 mL overnight starter cultures in LB with the appropriate antibiotic. These cultures were then used to inoculate 2 L of TB expression cultures, which were incubated at 37 °C with shaking (200 rpm) until they reached an OD600 of approximately 0.8. Cultures were then cooled at 4 °C for 0.5 h prior to the addition of isopropyl  $\beta$ -D-1-thiogalactopyranoside (IPTG) to a final concentration of 0.5 mM. Cultures were placed into an 18 °C incubator and shaken overnight (200 rpm). Cells were harvested by centrifugation at 4,500  $\times$  g for 15 min. The culture media was decanted and the cell paste stored at -80 °C prior to purification.

**Purification of PedA15 peptides and proteolytic removal of leader peptides.** Cell paste was suspended in 30 mL of lysis buffer (20 mM NaH<sub>2</sub>PO<sub>4</sub>, 500 mM NaCl, 0.5 mM imidazole, 20% glycerol, pH 7.5 at 25 °C) and lysed by sonication (40% amplitude, 4 s pulse, 9.9 s pause, 15 min). Crude lysate was centrifuged at 24,000 $\times$ g for 30 min at 4 °C and the supernatant discarded. The pellet was washed with lysis buffer prior to suspension in approximately 20 mL of denaturing buffer (6 M guanidine hydrochloride, 20 mM NaH<sub>2</sub>PO<sub>4</sub>, 500 mM NaCl, 0.5 mM imidazole, pH 7.5 at 25 °C). The resolubilized

portion was cleared by centrifugation and the supernatant further clarified through a 0.45  $\mu\text{m}$  syringe filter prior to loading onto Ni-nitrilotriacetic acid (NTA) resin equilibrated with denaturing buffer. After loading the filtered sample, the resin was washed with two column volumes (CV) each of denaturing buffer and washing buffer (4 M guanidine hydrochloride, 20 mM  $\text{NaH}_2\text{PO}_4$ , 300 mM NaCl, 30 mM imidazole, pH 7.5 at 25 °C). The desired PedA peptide was eluted using 1–3 CV of LanA Elution Buffer (4 M guanidine hydrochloride, 20 mM Tris HCl, pH 7.5 at 25 °C, 100 mM NaCl, 1 M imidazole). Peptides eluted from NiNTA resin were desalted using Bond Elut C18 solid phase extraction cartridges (Agilent), washed with 0.1% TFA in water, and eluted in 60% acetonitrile in water supplemented with 0.1% TFA. Desalted peptide solutions were lyophilized prior to downstream proteolysis or HPLC purification.

Where noted in text, peptides were digested with LysN (Pierce™), trypsin (TPCK-treated; Worthington Biochemical), LahT(150), or pfu aminopeptidase I (Takara). The LahT(150) protease was purified according to previously reported procedures.<sup>3</sup> LysN and trypsin reactions were conducted according to manufacturer instruction in 50 mM Tris HCl (pH 7.5) at a 1:100 (w/w) ratio of protease to substrate peptide in a 37 °C water bath overnight. Reactions containing LahT(150) were carried out in 50 mM Tris HCl (pH 7.5) at a 1:20 (w/w) ratio of protease to substrate at room temperature overnight. Reactions containing pfu aminopeptidase were conducted in 50 mM Tris HCl (pH 7.5) supplemented with 20  $\mu\text{M}$   $\text{CoCl}_2$  at a 1:100 (w/w) ratio of protease to substrate incubated at 55 °C. Reactions were monitored by MALDI-MS after ZipTip cleanup and reaction times extended as needed. Upon completion, cleavage products were purified by HPLC or solid-phase extraction using Bond Elut C18 (Agilent) cartridges.

**Matrix-assisted laser desorption/ionization time-of-flight mass spectrometry (MALDI-TOF MS) and MSMS analysis.** Mass spectrometry analysis was

carried out at the University of Illinois at Urbana-Champaign School of Chemical Sciences Mass Spectrometry Laboratory using either an Autoflex speed LRF MALDI-TOF (Bruker) or an UltrafleXtreme MALDI-TOF/TOF MS instrument (Bruker). All samples were purified by HPLC or desalted using ZipTip C18 (Millipore) pipet tips prior to analysis. Samples were co-spotted (1:1 v:v) on MALDI plates with a 50 mg/mL solution of 2,5-dihydroxybenzoic acid (DHB, Sigma) in 60% acetonitrile:40% water as matrix. Data was analyzed using mMass software.<sup>4</sup> MALDI-TOF MS was used for full-length peptides as this technique is well-suited for relatively high molecular weight peptides. However, mass accuracy at these m/z values is low for MALDI-TOF MS. Therefore, to verify correct structural assignment, full-length peptides were digested by proteases (see above) to obtain smaller peptides that were analyzed by high resolution ESI MS to obtain accurate m/z values. In addition, ESI was then used for tandem MS (MS/MS) experiments to also verify sequence identity. Generally the data by MALDI-TOF MS and ESI MS agreed with the exception of PedA15.1 for which a minor 6-fold dehydrated peptide was observed by ESI-MS but not MALDI-TOF MS.

LC-MS/MS was performed on a quadrupole/time-of-flight (Q/TOF) Synapt LC-MS (Waters) equipped with MassLynx software and a C18 UPLC column using a mobile phase of acetonitrile/water containing 0.1% formic acid (2-100% acetonitrile over 20 min; flow rate = 0.18 mL/min). Glu-1-fibrinopeptide B (Glu-Fib) was used for mass calibration prior to sample injection and data collection.

**N-Ethylmaleimide (NEM) cysteine alkylation assay.** The degree of cyclization of modified PedA15 peptides was determined through the alkylation of unreacted Cys thiols with NEM.<sup>5</sup> Prior to alkylation, samples were treated with 10 mM tris(2-carboxyethyl)phosphine (TCEP) in reaction buffer (100 mM sodium citrate, 1 mM EDTA, pH 6) for 10 min to ensure complete reduction of free cysteines. NEM (100 mM freshly prepared stock solution in ethanol) was then added to a final concentration of 10 mM.

This reaction was allowed to proceed for 20 min before desalting using C18-ziptips and analysis by MALDI-TOF MS. Unmodified NisA or PedA precursor peptides were used as positive controls to ensure complete alkylation was achieved under these conditions.

**Chiral gas chromatography – mass spectrometry.** Purified PedA15 core peptides or variants (~0.5-1 mg) were dissolved in 3 mL of 6 N DCI in D<sub>2</sub>O and sealed in a pressure tube. Each sample was heated to 110 °C in an oil bath for 24 h then cooled before solvent removal by rotary evaporation. In a separate flask, a solution of methanolic HCl was prepared by drop-wise addition of acetyl chloride (1.5 mL) to methanol (5 mL) in an ice-water bath. This solution (3 mL) was added to the hydrolysate residue and brought to 110 °C for 1 h under reflux. The reaction was allowed to cool prior to the removal of solvent by rotary evaporation. The resulting residue was then suspended in 3 mL of dichloromethane and cooled in an ice-water bath. Pentafluoropropionic anhydride (1 mL) was added to the reaction vessel, and the mixture heated to 110 °C for 1 h with reflux. The solution was cooled and the solvent removed under a gentle stream of nitrogen. The sample residue was then dissolved in 0.2 mL of methanol, centrifuged to remove any insoluble material, transferred to a clean vial, and stored at -20 °C prior to analysis. Gas chromatography–mass spectrometry (GC-MS) analysis was conducted on an Agilent HP 6890N instrument equipped with a CP-Chirasil-L-Val (Agilent) column (25 m x 0.25 mm x 0.12 µm). Samples in methanol (1–5 µL) were applied to the column via splitless injection (230 °C injector inlet temperature) with a helium flow at a rate of 1.7–2.0 mL/min. One of two temperature programs was used: (A) 5-min at 160 °C, followed by temperature increase of 3 °C min<sup>-1</sup> to 190 °C, and then held for 6 min; or (B) held at 80 °C for 5 min, then raised to 200 °C at a rate of 4 °C/min, and then held at 200 °C for an additional 3 min. Selected-ion monitoring (SIM) mode was used to detect characteristic mass fragments for derivatized lanthionine or methylanthionine (365 and 379 m/z, respectively). Stereochemical

determination for derivatized PedA15 samples was achieved through co-injection with pure synthetic standards prepared according to reported methods.<sup>6</sup>

**NMR spectroscopy.** Modified wild-type His<sub>6</sub>-PedA15.1 was expressed and affinity purified from 4 L of *E. coli* culture grown as described above, yielding ~5 mg of semi-pure full-length modified peptide. This peptide was then digested with trypsin and purified by C18 RP-HPLC as described above to yield ~1 mg final product. Product purity was confirmed by NEM assay and MALDI-MS before proceeding to NMR analysis. Due to poor solubility in water, the modified core peptide was dissolved in dimethyl sulfoxide-d<sub>6</sub> (DMSO-d<sub>6</sub>; Millipore-Sigma; 0.6 mL) and placed in an NMR tube. One dimensional <sup>1</sup>H NMR, and two-dimensional homonuclear <sup>1</sup>H-<sup>1</sup>H-TOCSY (total correlation spectroscopy) and NOESY (nuclear Overhauser effect spectroscopy) spectra were acquired using a Varian INOVA 750 MHz spectrometer equipped with a 5 mm triple resonance (<sup>1</sup>H-<sup>13</sup>C-<sup>15</sup>N) triaxial gradient probe with the use of VNMRJ 2.1B software and the BioPack suite of pulse sequences. The optimal temperature for analysis was determined to be 37 °C based on peak width. The data were processed using NMRPipe and subsequently analyzed in NMRViewJ. Chemical shift assignments are shown in Table S4.

Table S1. Plasmids constructed in this study. The primers used for each amplification are listed in Table S2.

| Plasmid                        | Vector                  | MCS   | Insert                       | Enzymes                     |
|--------------------------------|-------------------------|-------|------------------------------|-----------------------------|
| pPedA15.1                      | pETDuet-1               | MCS-1 | <i>pedA15.1</i>              | <i>Bam</i> HI, <i>Not</i> I |
| pPedA15.2                      | pETDuet-1               | MCS-1 | <i>pedA15.2</i>              | <i>Bam</i> HI, <i>Not</i> I |
| pPedAC15.1                     | pPedA15.1               | MCS-2 | <i>pedC15</i>                | <i>Nde</i> I, <i>Xho</i> I  |
| pPedAC15.2                     | pRSFDuet-1              | MCS-2 | <i>pedC15</i>                | <i>Nde</i> I, <i>Xho</i> I  |
| pPedB15                        | pRSFDuet-1              | MCS-1 | <i>pedB15</i>                | <i>Nco</i> I, <i>Not</i> I  |
| pPedC15                        | pACYDuet-1              | MCS-2 | <i>pedC15</i>                | <i>Nde</i> I, <i>Xho</i> I  |
| pPedtRNA <sup>Glu</sup>        | pCDFDuet-1              | MCS-1 | tRNA <sup>Glu</sup> NL19 x 2 | N/A                         |
| pPedtRNA <sup>Glu</sup> /GluRS | pPedtRNA <sup>Glu</sup> | MCS-2 | <i>gluRS</i> NL19            | <i>Nde</i> I, <i>Xho</i> I  |



Table S2. Primers used in this study for site-directed mutagenesis.

| <b>Name</b>           | <b>Sequence (5'-&gt;3')</b>                          |
|-----------------------|------------------------------------------------------|
| pedA15.1_fw_BamHI     | agtaggatccgatgaaaaagtaaagctaacca                     |
| pedA15.1_rv_NotI      | cgatgCGGCCGCTtaattGCCAAAAattaattatcaag               |
| pedA15.2_fw_BamHI     | agtaggatccgatgaaaaagtaaagctaacca                     |
| pedA15.2_rv_NotI      | cgatgCGGCCGCTtagtataatcttcccgtc                      |
| pedC15_fw_NdeI        | agtacatatggaactattgaaaaatatgaaag                     |
| pedC15_rv_XhoI        | cgatctcgagftaaggatccatgtaaattcat                     |
| pedB15_fw_NcoI        | cgatccatgggcatgcaaaaagcaaaaattacc                    |
| pedB15_rv_NotI        | cgatgCGGCCGCTtatgataatagtttaattggtg                  |
| pedGluRS_fw_NdeI      | agtacatatggaagaaagtagtagtaag                         |
| pedGluRS_rv_XhoI      | cgatctcgagftatccaaaagcagccagg                        |
| Gibson_pCDF_linear_fw | tcgtattgtacacggccg                                   |
| Gibson_pCDF_linear_rv | tatagtgagtcgtattaatttcta                             |
| PedA151_S7T_F         | ggataaattagagcccgtatacacgtcatattgtaggcattttaccacc    |
| PedA151_S7T_R         | ggtggtaaaaaatgcctacaatatgacgtgtataacgggctctaatttatcc |
| PedA151_S12T_F        | ctgactgacaggataaattagtgccggtatacatgacatatt           |
| PedA151_S12T_R        | aatatgtcatgtataacgggcactaattatcctgtcagtcag           |
| PedA151_S15T_F        | gctgactgacaggftaaattagagcccgtatacatgac               |
| PedA151_S15T_R        | gtcatgtataacgggctctaatttaacctgtcagtcagc              |
| PedA151_S18T_F        | ctccggatcacatttcgccgtctgacaggataaattagag             |
| PedA151_S18T_R        | ctctaatttatcctgtcagacggcgaaatgtgatccggaag            |
| Ped15_1_S7A_fw        | aatgcctacaatatggcatgtataacgggctc                     |
| Ped15_1_S7A_rv        | gagcccgtatacatgccatattgtaggcatt                      |
| Ped15_1_C8A_fw        | taaattagagcccgtatagctgacatattgtaggcattttaccacc       |
| Ped15_1_C8A_rv        | gggtggtaaaaaatgcctacaatatgtcagctataacgggctctaattta   |
| Ped15_1_T10A_fw       | cctacaatatgtcatgtatagcgggctctaatttatcctg             |
| Ped15_1_T10A_rv       | caggataaattagagcccgtatacatgacatattgtagg              |
| Ped15_1_S12A_fw       | gtcatgtataacgggctctaatttatcctgtc                     |
| Ped15_1_S12A_rv       | gacaggataaattagcggcgtatacatgac                       |
| Ped15_1_S15A_fw       | cgggctctaatttagcctgtcagtcagc                         |
| Ped15_1_S15A_rv       | gctgactgacaggctaaattagagcccg                         |
| Ped15_1_S26A_fw       | tcagcgaaatgtgatccggaagaagctcttgataatttaattttgg       |
| Ped15_1_S26A_rv       | ccaaaaattaattatcaagagcttcttccggatcacatttcgctga       |

Table S3: Organisms tested for antimicrobial activity of PedA15.1 and 15.2 products, both individually and in combination.

| Species                                     | Media    | Organism                                   | Modified Core Peptides Tested*                                                                                                   |
|---------------------------------------------|----------|--------------------------------------------|----------------------------------------------------------------------------------------------------------------------------------|
| <i>Micrococcus luteus</i><br>ATCC 4698      | Nutrient | Gram positive<br>Actinobacteria            | PedA15.1 <sup>LysN</sup> and<br>PedA15.2 <sup>LahT150</sup><br>PedA15.1 <sup>LysN+AP</sup> and<br>PedA15.2 <sup>LahT150+AP</sup> |
| <i>E. coli</i> DH5 $\alpha$                 | LB       | Gram negative<br>$\gamma$ -proteobacterium | PedA15.1 <sup>LysN</sup> and<br>PedA15.2 <sup>LahT150</sup><br>PedA15.1 <sup>LysN+AP</sup> and<br>PedA15.2 <sup>LahT150+AP</sup> |
| <i>Bacillus subtilis</i> ATCC<br>6633       | Nutrient | Gram positive<br>Firmicute                 | PedA15.1 <sup>LysN</sup> and<br>PedA15.2 <sup>LahT150</sup><br>PedA15.1 <sup>LysN+AP</sup> and<br>PedA15.2 <sup>LahT150+AP</sup> |
| <i>Pseudomonas aeruginosa</i> strain K      | Nutrient | Gram negative<br>$\gamma$ -proteobacterium | PedA15.1 <sup>LysN</sup> and<br>PedA15.2 <sup>LahT150</sup><br>PedA15.1 <sup>LysN+AP</sup> and<br>PedA15.2 <sup>LahT150+AP</sup> |
| <i>Saccharomyces cerevisiae</i>             | YPD      | yeast                                      | PedA15.1 <sup>LysN</sup> and<br>PedA15.2 <sup>LahT150</sup><br>PedA15.1 <sup>LysN+AP</sup> and<br>PedA15.2 <sup>LahT150+AP</sup> |
| <i>Kluyveromyces lactis</i>                 | YPD      | yeast                                      | PedA15.2 <sup>LahT150**</sup>                                                                                                    |
| <i>Aspergillus terreus</i>                  | YPD      | fungus                                     | PedA15.1 <sup>LysN</sup> and<br>PedA15.2 <sup>LahT150</sup><br>PedA15.1 <sup>LysN+AP</sup> and<br>PedA15.2 <sup>LahT150+AP</sup> |
| <i>Zygosaccharomyces rouxii</i>             | YPD      | yeast                                      | PedA15.1 <sup>LysN</sup> and<br>PedA15.2 <sup>LahT150</sup><br>PedA15.1 <sup>LysN+AP</sup> and<br>PedA15.2 <sup>LahT150+AP</sup> |
| <i>Chryseobacterium gregarium</i> DSM 1909  | Nutrient | Gram negative<br>Bacteroidetes             | PedA15.1 <sup>Trypsin,†</sup> and<br>PedA15.2 <sup>LahT150</sup>                                                                 |
| <i>Pedobacter alluvius</i><br>ATCC BAA-1554 | Nutrient | Gram negative<br>Bacteroidetes             | PedA15.1 <sup>Trypsin,†</sup> and<br>PedA15.2 <sup>LahT150</sup>                                                                 |

\*Superscript denotes proteases used to generate the core peptide fragments used during bioactivity screening. Following LysN or LahT150 digestion, peptides were first partially purified by C18 SPE and tested prior to a second digestion with Pfu aminopeptidase ("AP", Takara Bio) and subsequent testing.

\*\* Insufficient material for testing PedA15.1.

† At the time that these experiments were done, endoproteinase LysN was no longer commercially available and trypsin was used to remove the leader peptide, which removes one more Lys residue.

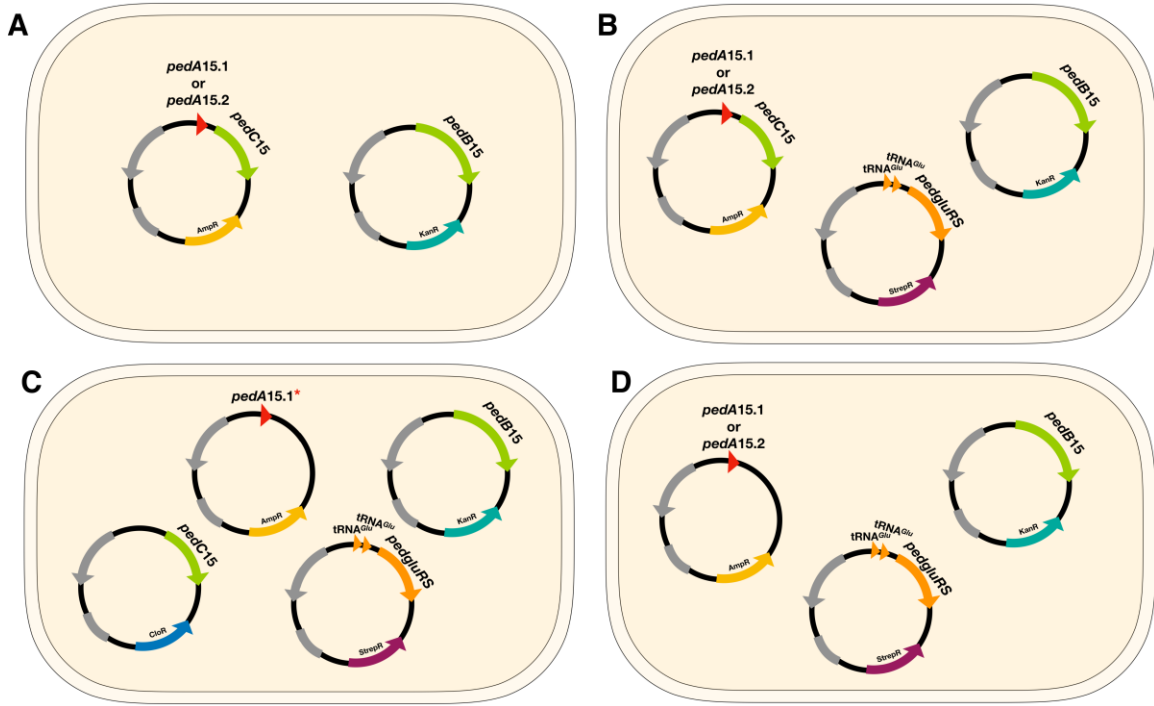

**Figure S1:** Schematic representation of the *ped15* expression systems in *E. coli* BL21(DE3) used in this study. The PedA15.1 and PedA15.2 peptides produced with the first system (A), which did not include the *tRNA<sup>Glu</sup>* and *gluRS* genes of *P. lusitanus* NL19, were not dehydrated by PedB15. However, in the presence of these two genes (B), PedB15 was able to dehydrate both PedA15 peptides. Finally, to ease the production of PedA15.1 variants a third system was developed (C). In the last system, *pedA15.1* was expressed in an independent vector, which allows its use in site-directed mutagenesis, followed by transformation of *E. coli* BL21(DE3) competent cells harboring three plasmids that express all the other genetic determinants required for PedA15.1 modification. Panel D corresponds to the *E. coli* expression system that allowed the purification of PedA15 peptides without modification by PedC15.

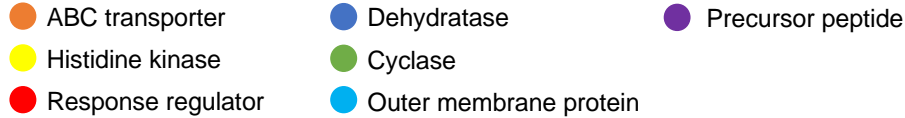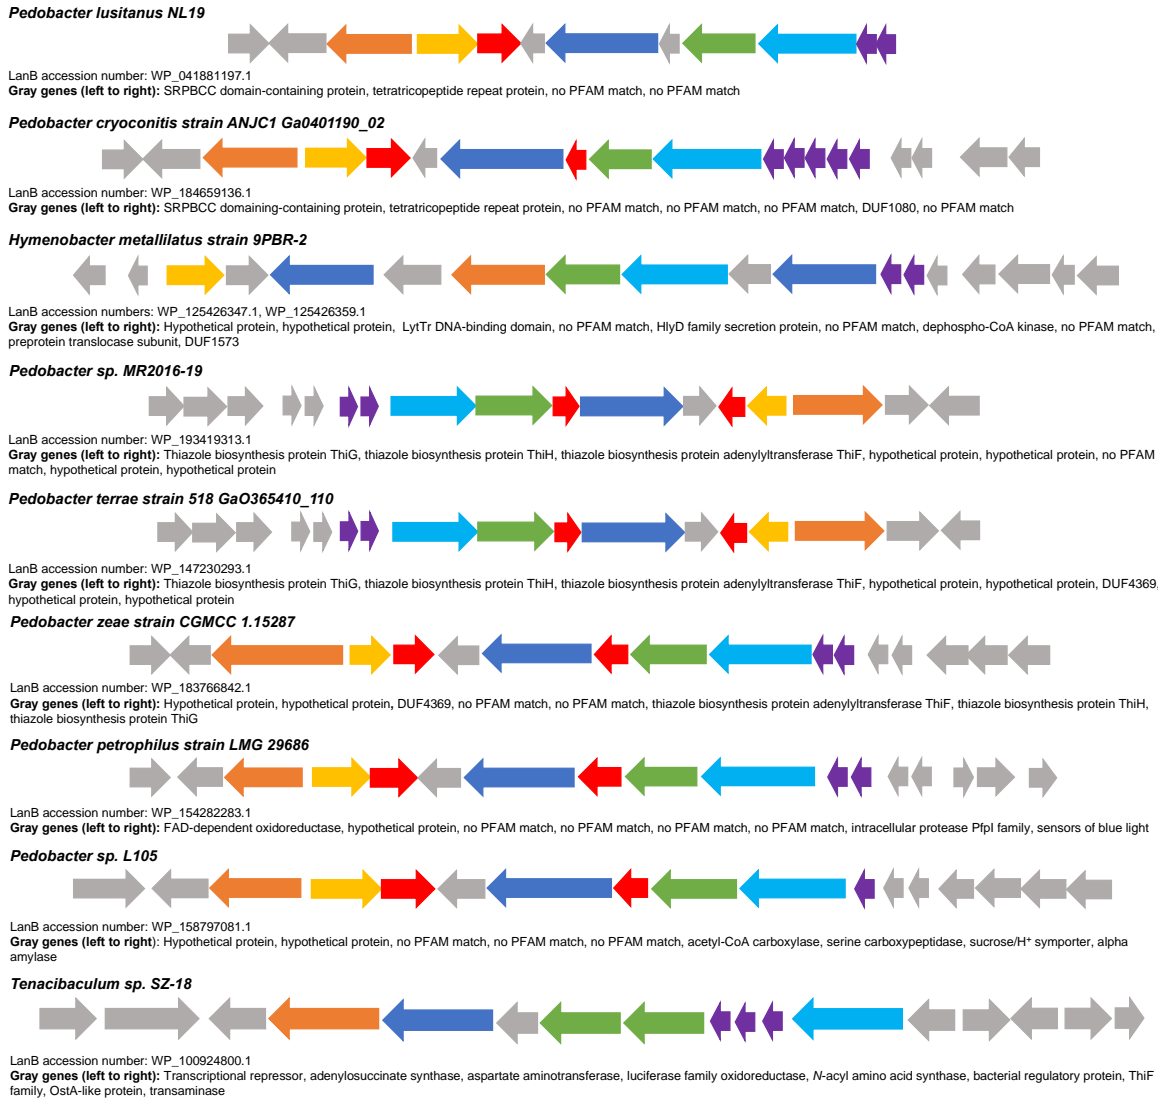

**Figure S2.** Gene neighborhood of BGCs resembling the cluster in *P. lusitanus*. The genes located up and downstream of the colored core genes depicted in Figure 1B are not conserved across the BGCs suggesting that they are not part of a conserved biosynthetic pathway. The predicted function of the grey genes on both ends of the BGC are shown below each cluster. The LanB accession number is given for each BGC for reference. For sequences of the putative precursor peptides, see Figure S13. The BGC in *P. lusitanus* NL19 is at the end of a contig and hence no information is available regarding the genes that flank the precursor peptide genes. The last partial ORF on the contig appears to encode another PedA ortholog.

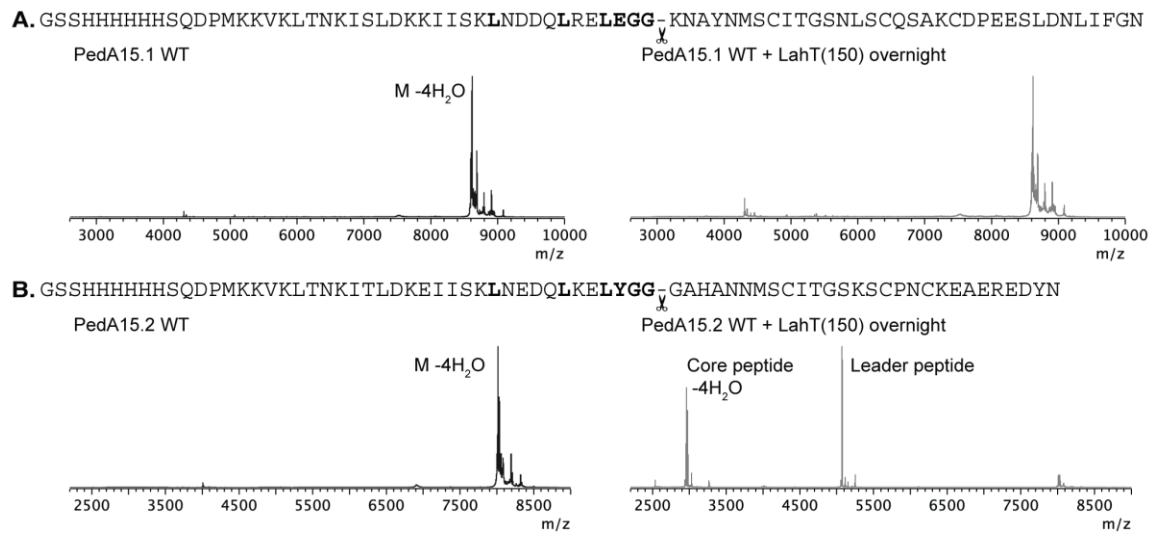

**Figure S3:** Susceptibility of PedA15 peptides towards LahT150 for leader peptide removal. (A) His<sub>6</sub>-tagged wild-type Ped15B/C-modified PedA15.1 before (left, black) and after (right, grey) overnight incubation with LahT150. The full-length peptide was modified (4x dehydrated, [M+H]<sup>+</sup> avg., m/z 8616.592 calc.; 8616.740 obs.), however, no proteolysis by LahT150 could be observed after overnight incubation. (B) His<sub>6</sub>-tagged Ped15B/C-modified PedA15.2 before (left, black) and after (right, grey) overnight incubation with LahT150. Proteolysis of full-length PedA15.2 was apparent by the appearance of mass fragments consistent with 4x dehydrated core peptide ([M]<sup>+</sup> avg., m/z 2958.2 calc.; 2958.0 obs.) and the leader peptide ([M]<sup>+</sup> avg., m/z 5072.7 calc.; 5072.4 obs.).

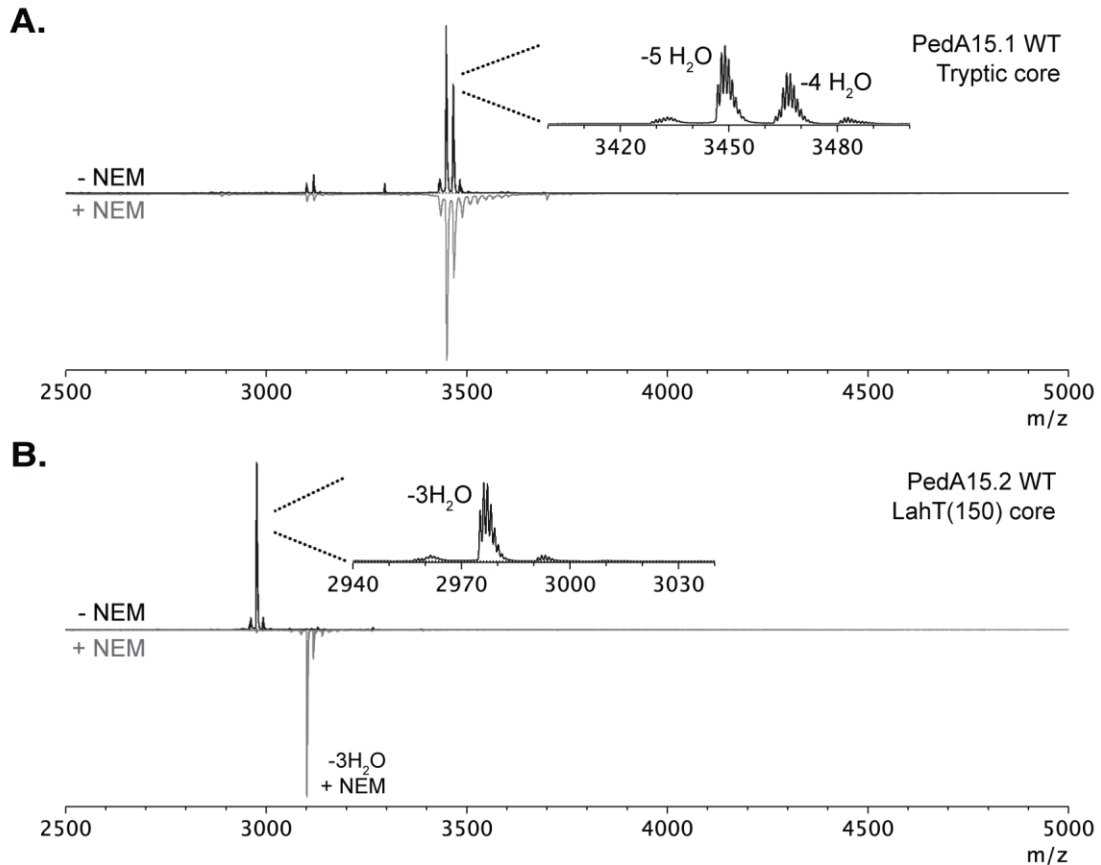

**Figure S4:** MALDI-TOF MS analysis of HPLC-purified PedA15.1 and PedA15.2 core peptide fragments. PedA peptides were coexpressed with PedB15, PedC15, and *P. lusitanus* tRNA<sup>Glu</sup>/GluRS. (A) PedA15.1 tryptic core peptide was purified by HPLC prior to MALDI-TOF MS analysis before (black) and after (grey) treatment with NEM. Purified product contained fully cyclized product and contained mainly 5x dehydrated ([M] avg., m/z 3449.8 calc.; 3449.4 obs.) product, although some 4x dehydrated ([M+H] avg., m/z 3466.5 calc.; 3466.6 obs.) peptide was also present and could not be separated by HPLC. (B) PedA15.2 leader peptide was removed by digestion with LahT150 and the 3x dehydrated core peptide purified by HPLC prior to MALDI-TOF MS analysis before (top) and after NEM alkylation (bottom). Thus, unlike four times dehydrated PedA15.2 (Fig. S3), 3x dehydrated ([M] avg. m/z 2974.2 calc.; 2974.4 obs.) PedA15.2 has a free Cys that has not cyclized and could be separated by HPLC.

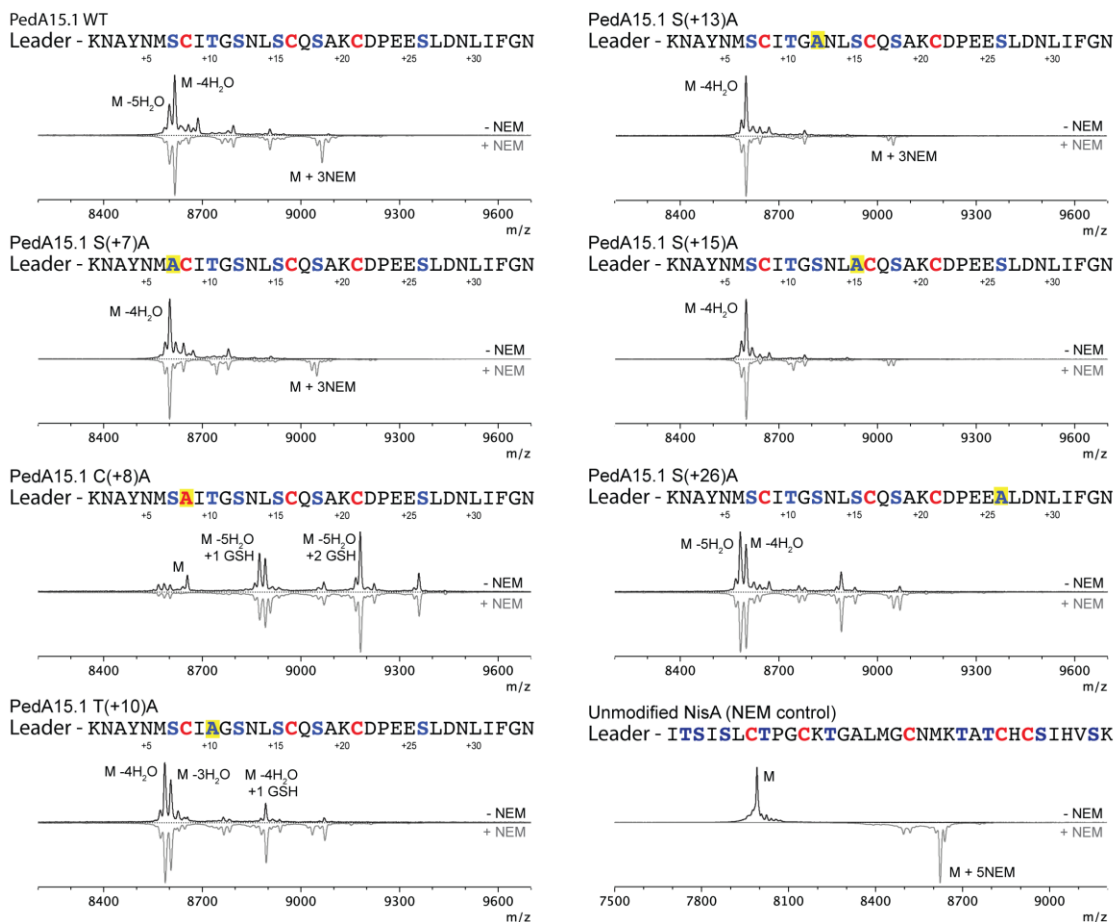

**Figure S5:** Ser-to-Ala PedA15.1 variants co-expressed with Ped15B/C. Peptides were analyzed by MALDI-TOF MS prior to (top; black) and after (bottom; grey) NEM alkylation. The S7A, S12A, and S15A variants (mutation highlighted in yellow) are all dehydrated four times suggesting the Ser residues at these positions are dehydrated in the 5-times dehydrated wild-type product. The lack of NEM alkylation observed for all three peptides suggests that all Cys residues are cyclized, which is only possible if non-natural Lan/MeLan rings are formed. Such observations have been reported previously for lanthipeptide variants and illustrates the peril of ring assignments based on alanine scanning mutations.<sup>7</sup> We therefore commenced with NMR experiments to determine the ring pattern as described in the main text. WT, wild-type; NEM, *N*-ethylmaleimide. Right bottom: NisA precursor peptide was included for analysis to ensure complete alkylation by NEM was taking place under the reaction conditions.

PedA15.1 Trypsin: NAYNM**SCITGSNLS**SCQ**SAKCDPEESLDNLI**FGN

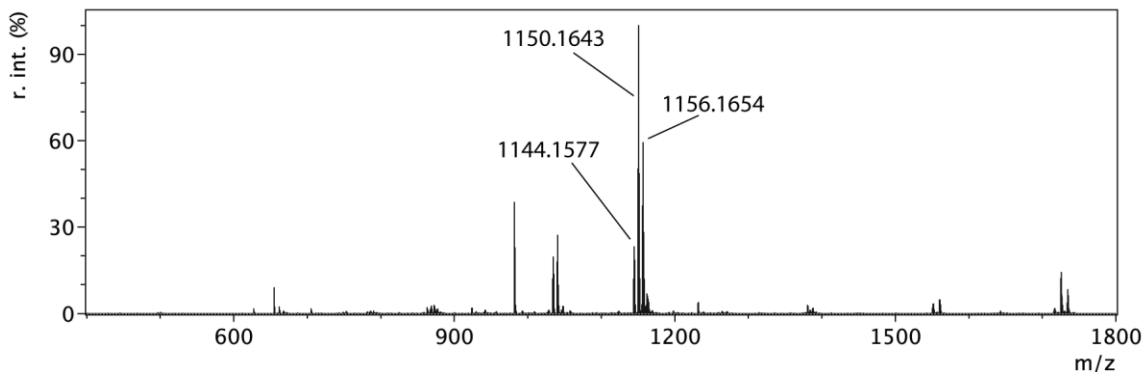

**Figure S6:** LC-MS analysis (ESI) of 6-, 5-, and 4-fold dehydrated PedA15.1 after trypsin digestion.  $[M+3H]^{3+}$  is depicted for the various dehydration states. The peak values in the figure are the monoisotopic masses, which are given below: observed and calculated m/z: PedA15.1 – 6 H<sub>2</sub>O (m/z 1144.1486 calc.; 1144.1577 obs.), PedA15.1 – 5 H<sub>2</sub>O (m/z 1150.1536 calc.; 1150.1643 obs.), PedA15.1 – 4 H<sub>2</sub>O (m/z 1156.1587 calc.; 1156.1654 obs.). The minor 6-fold dehydrated peptide was not observed by MALDI-TOF MS. The additional dehydration likely involves Ser26 because that is the only additional Ser/Thr in the peptide.

PedA15.2 LahT150: GAHAN**MS**C**ITG**S**KS**C**P**N**C**KEA**ER**D**Y**N

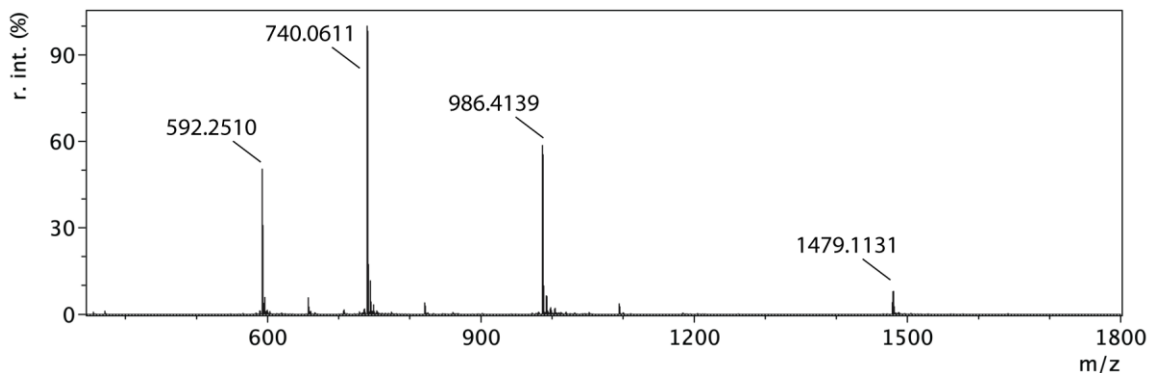

**Figure S7:** LC-MS analysis (ESI) of 4-fold dehydrated PedA15.2 after LahT150 digestion.  $[M+5H]^{5+}$ ,  $[M+4H]^{4+}$ ,  $[M+3H]^{3+}$ , and  $[M+2H]^{2+}$  were observed. The peak values in the figure are monoisotopic masses, which are given below. m/z: PedA15.2 – 4 H<sub>2</sub>O,  $[M+H]^{5+}$  (m/z 592.2456 calc.; 592.2510 obs.), PedA15.2 – 4 H<sub>2</sub>O,  $[M+4H]^{4+}$  (m/z 740.0552 calc.; 740.0611 obs.), PedA15.2 – 4 H<sub>2</sub>O,  $[M+3H]^{3+}$  (m/z 986.4046 calc.; 986.4139 obs.), PedA15.2 – 4 H<sub>2</sub>O,  $[M+2H]^{2+}$  (m/z 1479.1033 calc.; 1479.1131 obs.).



PedA15.1 Trypsin: NAYNM**S**C**I**T**G**SNL**S**C**Q**S**A**K**C**D**P**E**E**S**L**D**N**L**I**F**G**N  
 b3 b4 b5 y12 y5 y4 y3  
 b21 b23 b24 b27

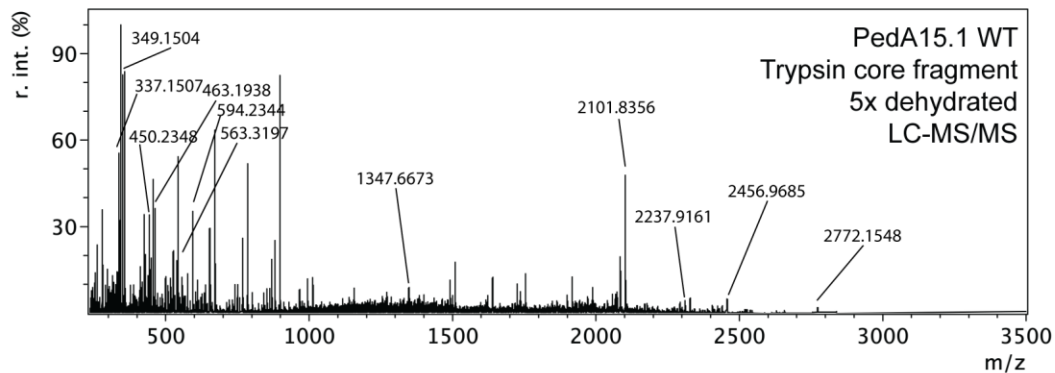

| b <sup>+</sup> ions |           |    |    | y <sup>+</sup> ions |           |           |
|---------------------|-----------|----|----|---------------------|-----------|-----------|
| obs.                | calc.     | #  | AA | #                   | calc.     | obs.      |
|                     | 115.0502  | 1  | N  | 33                  |           |           |
|                     | 186.0873  | 2  | A  | 32                  | 3334.4036 |           |
| 349.1504            | 349.1506  | 3  | Y  | 31                  | 3263.3665 |           |
| 463.1938            | 463.1936  | 4  | N  | 30                  | 3100.3032 |           |
| 594.2344            | 594.2341  | 5  | M  | 29                  | 2986.2602 |           |
|                     | 663.2508  | 6  | S  | 28                  | 2855.2198 |           |
|                     | 766.2600  | 7  | C  | 27                  | 2786.2030 |           |
|                     | 879.3441  | 8  | I  | 26                  | 2683.1938 |           |
|                     | 962.3765  | 9  | T  | 25                  | 2570.1098 |           |
|                     | 1019.3979 | 10 | G  | 24                  | 2487.0774 |           |
|                     | 1088.4147 | 11 | S  | 23                  | 2430.0559 |           |
|                     | 1202.4576 | 12 | N  | 22                  | 2361.0391 |           |
|                     | 1315.5417 | 13 | L  | 21                  | 2246.9962 |           |
|                     | 1384.5584 | 14 | S  | 20                  | 2133.9122 |           |
|                     | 1487.5676 | 15 | C  | 19                  | 2064.8954 |           |
|                     | 1615.6262 | 16 | Q  | 18                  | 1961.8862 |           |
|                     | 1684.6429 | 17 | S  | 17                  | 1833.8276 |           |
|                     | 1755.6800 | 18 | A  | 16                  | 1764.8109 |           |
|                     | 1883.7750 | 19 | K  | 15                  | 1693.7738 |           |
|                     | 1986.7842 | 20 | C  | 14                  | 1565.6788 |           |
| 2101.8356           | 2101.8111 | 21 | D  | 13                  | 1462.6696 |           |
|                     | 2198.8639 | 22 | P  | 12                  | 1347.6427 | 1347.6673 |
| 2237.9161           | 2327.9065 | 23 | E  | 11                  | 1250.5899 |           |
| 2456.9685           | 2456.9491 | 24 | E  | 10                  | 1121.5473 |           |
|                     | 2543.9811 | 25 | S  | 9                   | 992.5047  |           |
|                     | 2657.0652 | 26 | L  | 8                   | 905.4727  |           |
| 2772.1548           | 2772.0921 | 27 | D  | 7                   | 792.3886  |           |
|                     | 2886.1350 | 28 | N  | 6                   | 677.3617  |           |
|                     | 2999.2191 | 29 | L  | 5                   | 563.3188  | 563.3197  |
|                     | 3112.3032 | 30 | I  | 4                   | 450.2347  | 450.2348  |
|                     | 3259.3716 | 31 | F  | 3                   | 337.1506  | 337.1507  |
|                     | 3316.3930 | 32 | G  | 2                   | 190.0822  |           |
|                     |           | 33 | N  | 1                   | 133.0608  |           |

**Figure S8:** LC-MS/MS analysis (ESI) of 5x dehydrated PedA15.1 core peptide with observed b- and y-ions labeled. The most C-terminal serine evades dehydration in this peptide. A lack of fragmentation within the central part of the peptide sequence is consistent with formation of overlapping lanthionines.

PedA15.2 LahT150: GAHANNM**SC**ITG**SK**SCPN**C**KEAEREDYN  
 y25y24y23y22 y8 y7 y6 y5  
 b3 b4 b5 b6 b7

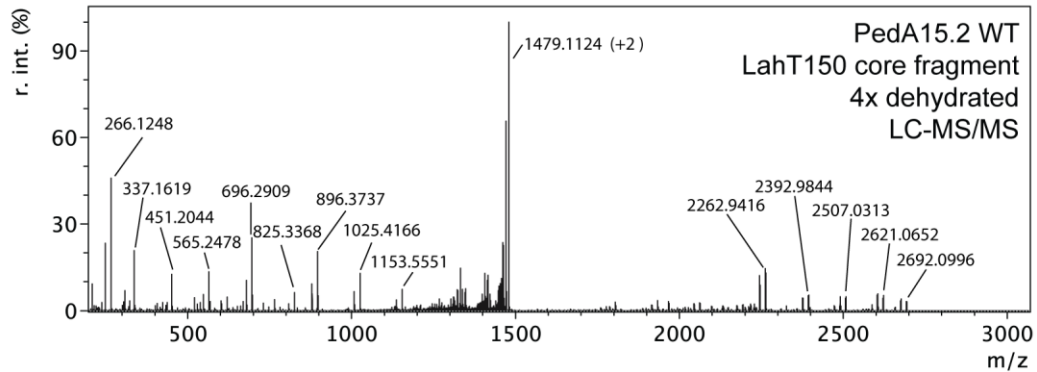

| b <sup>+</sup> ions   |           |           |     | y <sup>+</sup> ions |           |           |
|-----------------------|-----------|-----------|-----|---------------------|-----------|-----------|
| obs.                  | calc.     | #         | AA  | #                   | calc.     | obs.      |
|                       | 58.0287   | 1         | G   | 28                  |           |           |
|                       | 129.0659  | 2         | A   | 27                  | 2900.1779 |           |
|                       | 266.1248  | 3         | H   | 26                  | 2829.1408 |           |
|                       | 337.1619  | 4         | A   | 25                  | 2692.0818 | 2692.0996 |
|                       | 451.2044  | 5         | N   | 24                  | 2621.0447 | 2621.0652 |
|                       | 565.2478  | 6         | N   | 23                  | 2507.0018 | 2507.0313 |
|                       | 696.2909  | 7         | M   | 22                  | 2392.9589 | 2392.9844 |
| Lanthionine<br>Region | 765.3050  | 8         | Dha | 21                  | 2261.9184 |           |
|                       | 868.3142  | 9         | C   | 20                  | 2192.9016 |           |
|                       | 981.3982  | 10        | I   | 19                  | 2089.8925 |           |
|                       | 1064.4306 | 11        | Dhb | 18                  | 1976.8084 |           |
|                       | 1121.4521 | 12        | G   | 17                  | 1893.7760 |           |
|                       | 1190.4688 | 13        | Dha | 16                  | 1836.7545 |           |
|                       | 1318.5638 | 14        | K   | 15                  | 1767.7378 |           |
|                       | 1387.5805 | 15        | Dha | 14                  | 1639.6428 |           |
|                       | 1490.5897 | 16        | C   | 13                  | 1570.6261 |           |
|                       | 1587.6425 | 17        | P   | 12                  | 1467.6169 |           |
|                       | 1701.6854 | 18        | N   | 11                  | 1370.5641 |           |
|                       | 1804.6946 | 19        | C   | 10                  | 1256.5212 |           |
|                       |           | 1932.7896 | 20  | K                   | 9         | 1153.5120 |
|                       | 2061.8322 | 21        | E   | 8                   | 1025.4170 | 1025.4166 |
|                       | 2132.8693 | 22        | A   | 7                   | 896.3745  | 896.3737  |
|                       | 2261.9119 | 23        | E   | 6                   | 825.3373  | 825.3368  |
|                       | 2418.0130 | 24        | R   | 5                   | 696.2947  | 696.2909  |
|                       | 2547.0556 | 25        | E   | 4                   | 540.1936  |           |
|                       | 2662.0825 | 26        | D   | 3                   | 411.1510  |           |
|                       | 2825.1458 | 27        | Y   | 2                   | 296.1241  |           |
|                       |           | 28        | N   | 1                   | 133.0608  |           |

**Figure S9:** LC-MS/MS analysis of 4x dehydrated PedA15.2 core peptide with observed b- and y-ions labeled. A lack of fragmentation within the central part of the peptide sequence is consistent with lanthionine ring formation.

PedA15.2 LahT150: GAHANM**S**CI**T**GS**K**S**C**PN**C**KEAEREDYN  
 b2b3b4b5b6b7 y26 y12 y8y7y6y5 b26

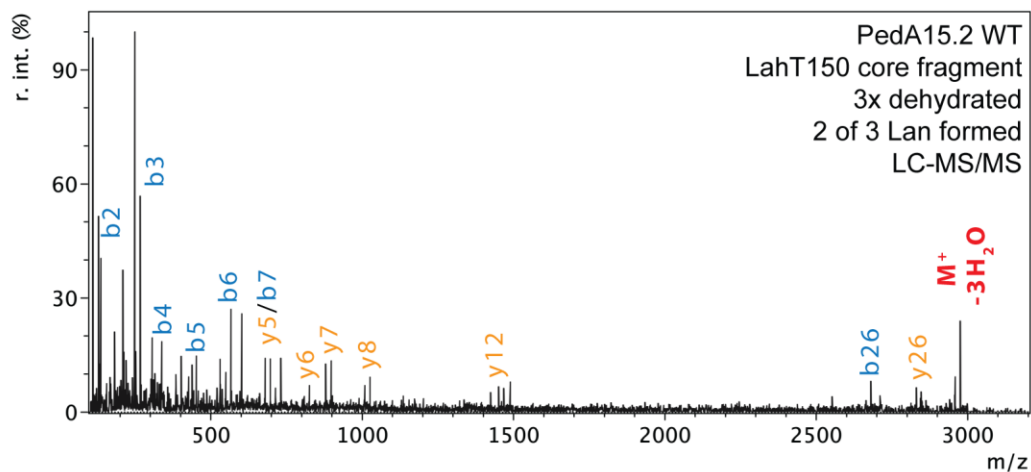

| b <sup>+</sup> ions       |           |          |            | y <sup>+</sup> ions |           |                  |  |
|---------------------------|-----------|----------|------------|---------------------|-----------|------------------|--|
| obs.                      | calc.     | #        | AA         | #                   | calc.     | obs.             |  |
|                           | 58.0287   | 1        | <b>G</b>   | 28                  | 2975.2147 | <b>2975.2698</b> |  |
| <b>129.1047</b>           | 129.0659  | 2        | <b>A</b>   | 27                  | 2918.1931 |                  |  |
| <b>266.1297</b>           | 266.1248  | 3        | <b>H</b>   | 26                  | 2847.1560 | <b>2846.1252</b> |  |
| <b>337.1659</b>           | 337.1619  | 4        | <b>A</b>   | 25                  | 2710.0971 |                  |  |
| <b>451.2054</b>           | 451.2048  | 5        | <b>N</b>   | 24                  | 2639.0600 |                  |  |
| <b>565.2441</b>           | 565.2477  | 6        | <b>N</b>   | 23                  | 2525.0171 |                  |  |
| <b>696.2845</b>           | 696.2882  | 7        | <b>M</b>   | 22                  | 2410.9742 |                  |  |
| <b>Lanthionine Region</b> | 765.3050  | 8        | <b>Dha</b> | 21                  | 2279.9337 |                  |  |
|                           | 868.3142  | 9        | <b>C</b>   | 20                  | 2210.9169 |                  |  |
|                           | 981.3982  | 10       | <b>I</b>   | 19                  | 2107.9077 |                  |  |
|                           | 1064.4306 | 11       | <b>Dhb</b> | 18                  | 1994.8237 |                  |  |
|                           | 1121.4521 | 12       | <b>G</b>   | 17                  | 1911.7913 |                  |  |
|                           | 1208.4841 | 13       | <b>S</b>   | 16                  | 1854.7698 |                  |  |
|                           | 1336.5791 | 14       | <b>K</b>   | 15                  | 1767.7378 |                  |  |
|                           | 1405.5958 | 15       | <b>Dha</b> | 14                  | 1639.6428 |                  |  |
| 1508.6050                 | 16        | <b>C</b> | 13         | 1570.6261           |           |                  |  |
|                           | 1605.6578 | 17       | <b>P</b>   | 12                  | 1467.6169 | <b>1467.6117</b> |  |
|                           | 1719.7007 | 18       | <b>N</b>   | 11                  | 1370.5641 |                  |  |
|                           | 1822.7099 | 19       | <b>C</b>   | 10                  | 1256.5212 |                  |  |
|                           | 1950.8048 | 20       | <b>K</b>   | 9                   | 1153.5120 |                  |  |
|                           | 2079.8474 | 21       | <b>E</b>   | 8                   | 1025.4170 | <b>1025.4194</b> |  |
|                           | 2150.8845 | 22       | <b>A</b>   | 7                   | 896.3745  | <b>896.3729</b>  |  |
|                           | 2279.9271 | 23       | <b>E</b>   | 6                   | 825.3373  | <b>825.3412</b>  |  |
|                           | 2436.0283 | 24       | <b>R</b>   | 5                   | 696.2947  | <b>696.2845</b>  |  |
|                           | 2565.0708 | 25       | <b>E</b>   | 4                   | 540.1936  |                  |  |
| <b>2680.1108</b>          | 2680.0978 | 26       | <b>D</b>   | 3                   | 411.1510  |                  |  |
|                           | 2843.1611 | 27       | <b>Y</b>   | 2                   | 296.1241  |                  |  |
|                           | 2957.2041 | 28       | <b>N</b>   | 1                   | 133.0608  |                  |  |

**Figure S10:** LC-MS/MS analysis of 3x dehydrated PedA15.2 core peptide with observed b- and y-ions labeled. Presence of the y12 ion suggests that Cys19 evades cyclization in this intermediate, possibly a consequence of incomplete dehydration for the 3x-dehydrated species.

**Table S4.** Chemical shift assignments for 4-fold dehydrated PedA15.1 core peptide.

| Residue*      | HN    | H $\alpha$   | H $\beta$     | Others                                                                                                    |
|---------------|-------|--------------|---------------|-----------------------------------------------------------------------------------------------------------|
| Asn (2)       |       |              |               |                                                                                                           |
| Ala (3)       | 8.454 | 4.257        | 1.191         |                                                                                                           |
| Tyr (4)       | 7.974 | 4.381        | 2.918, 2.701  | 6.640 3H, 5H; 7.016 2H, 6H                                                                                |
| Asn (5)       | 8.062 | 4.543        | 2.607, 2.461  | 6.877, 7.381 $\gamma$ NH <sub>2</sub>                                                                     |
| Met (6)       | 7.920 | 4.397        | 1.970         | 2.409 $\gamma$ CH <sub>2</sub>                                                                            |
| Ser (Lan; 7)  | 8.295 | 4.432        | 2.965         |                                                                                                           |
| Cys (Lan; 8)  | 7.639 | 4.681        | 3.0831, 2.882 |                                                                                                           |
| Ile (9)       | 8.035 | 4.156        | 1.826         | 1.532-1.194 $\gamma$ CH <sub>2</sub> ; 0.942 $\gamma$ CH <sub>3</sub> ;<br>0.874 $\delta$ CH <sub>3</sub> |
| Thr (Dhb10)** | 9.355 | -            | 6.423         | 1.672 $\gamma$ CH <sub>3</sub>                                                                            |
| Gly (11)      | 8.057 | 3.805, 3.642 |               |                                                                                                           |
| Ser (12)***   | 7.288 | 4.291        | 3.657, 3.712  |                                                                                                           |
| Asn (13)      | 8.440 | 4.477        | 2.549         | 6.844, 7.327 $\gamma$ NH <sub>2</sub>                                                                     |
| Leu (14)      | 7.795 | 4.230        | 1.593         | 1.496 $\gamma$ CH;<br>0.870, 0.810 $\delta$ CH <sub>3</sub>                                               |
| Ser (Lan; 15) | 7.504 | 4.463        | 2.901, 3.022  |                                                                                                           |
| Cys (Lan; 16) | 8.057 | 4.121        | 3.032, 2.904  |                                                                                                           |
| Gln (17)      | 7.970 | 4.098        | 1.855         | 2.129 $\gamma$ CH <sub>2</sub> ; 6.728, 7.214 $\gamma$ NH <sub>2</sub>                                    |
| Ser (Lan; 18) | 8.328 | 4.824        | 2.869, 2.974  |                                                                                                           |
| Ala (19)      | 8.135 | 3.976        | 1.373         |                                                                                                           |
| Lys (20)      | 7.623 | 4.391        | 2.023, 1.441  | 1.305 $\gamma$ CH <sub>2</sub> ; 1.569 $\delta$ CH <sub>2</sub> ; 2.779<br>$\epsilon$ CH <sub>2</sub>     |
| Cys (Lan; 21) | 6.885 | 4.021        | 3.295, 2.709  |                                                                                                           |
| Asp (22)      | 8.380 | 4.753        | 2.696, 2.402  |                                                                                                           |
| Pro (23)      | -     | 4.310        | 2.043, 1.908  | 1.876 $\gamma$ CH <sub>2</sub> ; 3.645 $\delta$ CH <sub>2</sub>                                           |
| Glu (24)      | 7.896 | 4.163        | 1.932, 1.793  | 2.257 $\gamma$ CH <sub>2</sub>                                                                            |
| Glu (25)      | 7.696 | 4.286        | 1.757, 1.935  | 2.226 $\gamma$ CH <sub>2</sub>                                                                            |
| Ser (26)      | 7.817 | 4.327        | 3.599         |                                                                                                           |
| Leu (27)      | 7.957 | 4.268        | 1.490         | 1.625 $\gamma$ CH; 0.829, 0.870 $\delta$ CH <sub>3</sub>                                                  |
| Asp (28)      | 8.055 | 4.508        | 2.681, 2.500  |                                                                                                           |
| Asn (29)      | 7.879 | 4.504        | 2.549, 2.467  |                                                                                                           |
| Leu (30)      | 7.716 | 4.228        | 1.466         | 1.599 $\gamma$ CH;<br>0.807, 0.863 $\delta$ CH <sub>3</sub>                                               |
| Ile (31)      | 7.536 | 4.061        | 1.668         | 1.302-1.052 $\gamma$ CH <sub>2</sub> ;<br>0.667 $\gamma$ CH <sub>3</sub> ; 0.749 $\delta$ CH <sub>3</sub> |
| Phe (32)      | 7.814 | 4.533        | 3.051, 2.813  | 7.230 3H, 5H; 7.158 4H; 6.706<br>2H, 6H                                                                   |
| Gly (33)      | 8.005 | 3.733        |               |                                                                                                           |
| Asn (34)      | 7.974 | 4.547        | 2.561, 2.479  | 7.334, 6.9057 $\gamma$ NH <sub>2</sub>                                                                    |

\* Residues are numbered according to their position relative to the Gly-Gly leader peptide proteolytic site. Lys1 was removed through the use of trypsin for leader peptide removal from the core peptide in this experiment.

\*\* a faint set of signals indicative of Dhb at this residue was observed at 9.040 (NH), 6.232 (vinylic CH) and 1.680 (CH<sub>3</sub>) ppm. We attribute these signals to the presence of a 5-fold dehydrated peptide that is additionally dehydrated at Ser26.

\*\*\* Due to the presence of both 4x and 5x dehydrated products, signals for both Ser12 and Dha12 are visible in the spectra. Ser12 chemical shifts are shown in the table above, whereas the presence of Dha12 is clearly evident by geminal vinylic signals at 5.550 and 5.226.

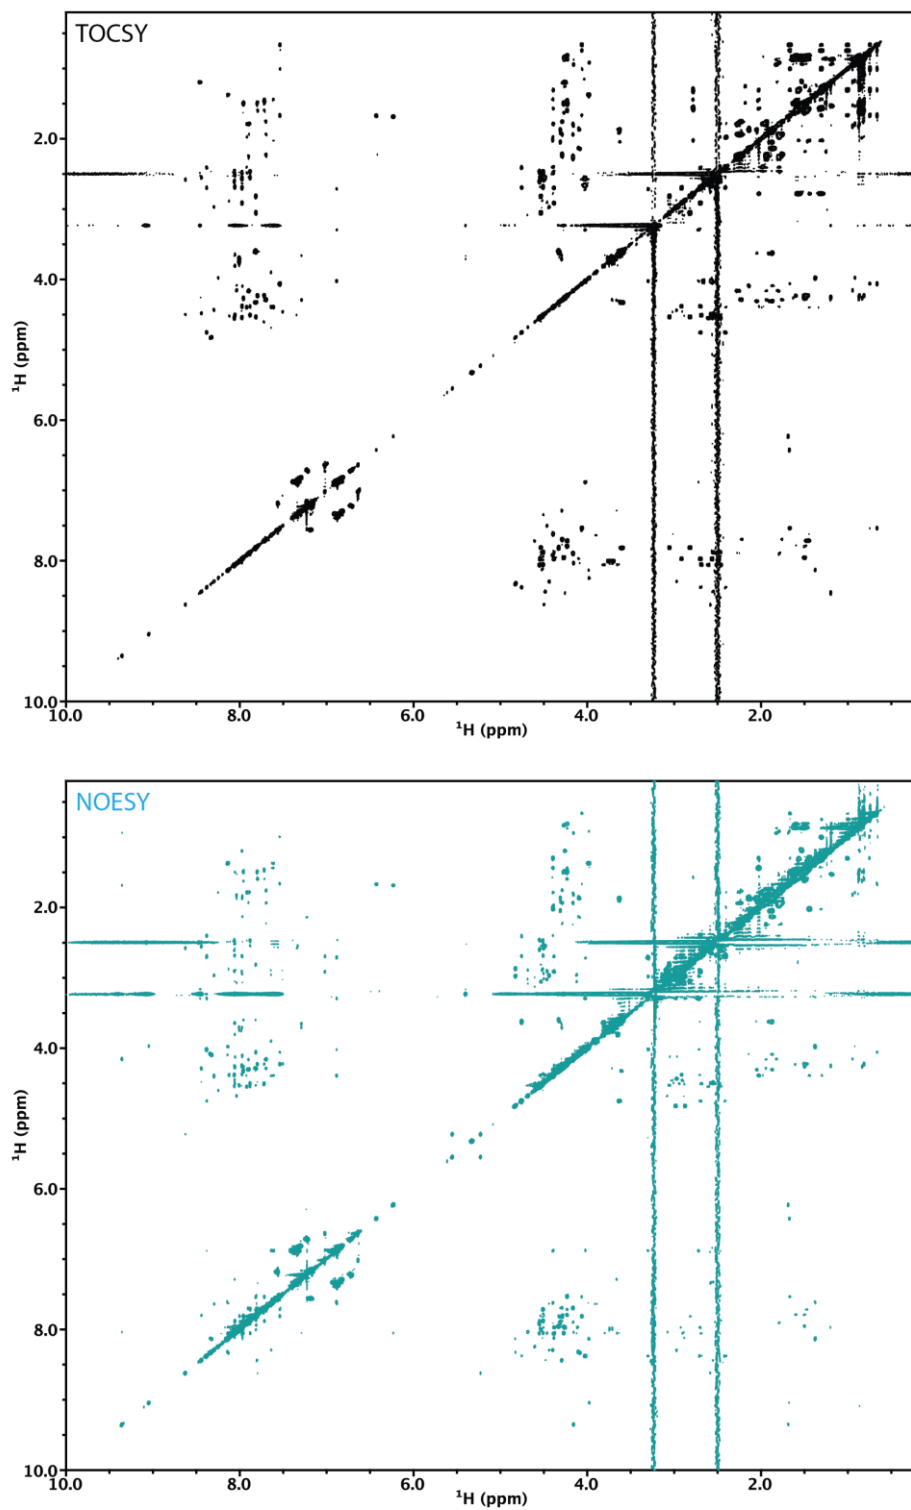

**Figure S11:** PedA15.1 core peptide TOCSY and NOESY spectra used for structural assignment and topology determination.

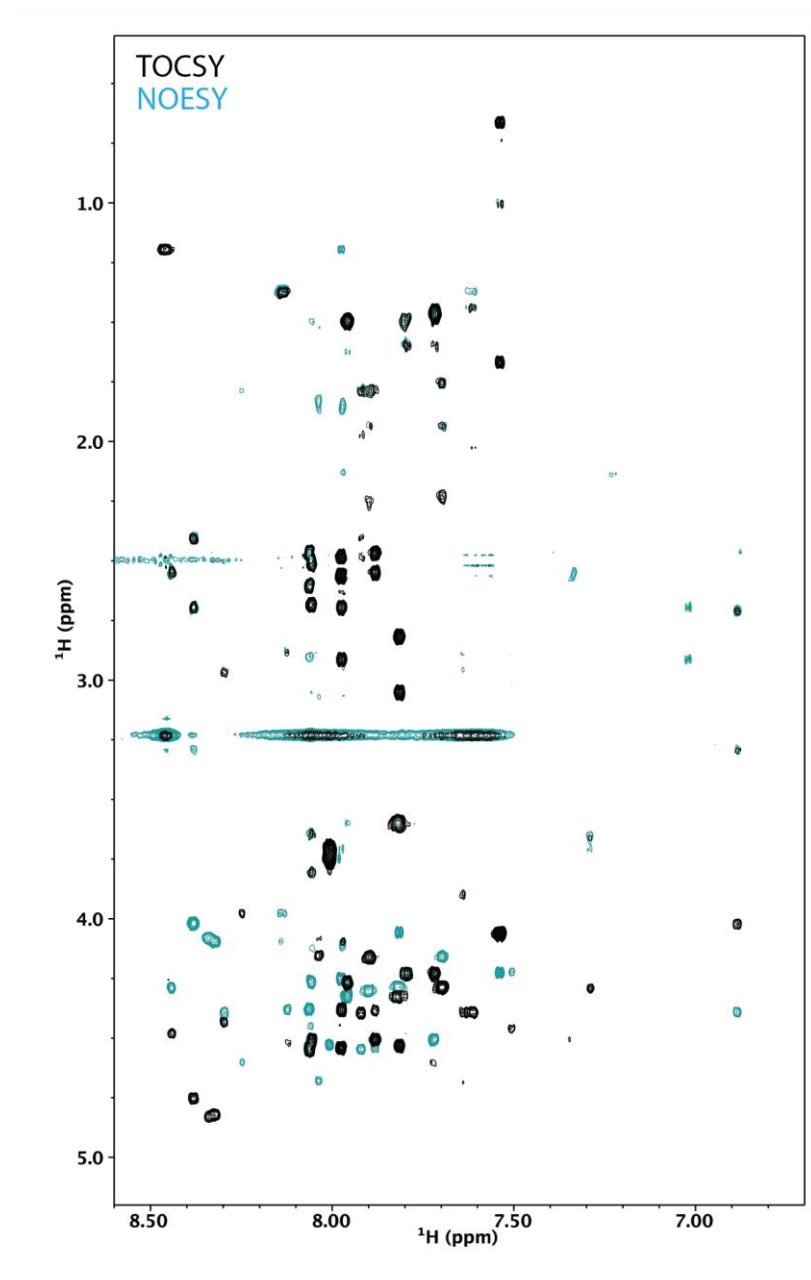

**Figure S12:** Zoomed overlay of TOCSY and NOESY spectra in the fingerprint region. Identified TOCSY spin-systems were correlated in-sequence through cross-reference to the NOESY spectra.

|                | -12      -7      -1              |                                   |
|----------------|----------------------------------|-----------------------------------|
| WP_041881204.1 | MKKVKLTNKITLDKEII SKLNEDQLKELYGG | GAHANNMSCITGSKSCPNCKEAEREDYN---   |
| WP_200890725.1 | ----NLSDKVQLDKEIISKLTQDQLSELEGG  | --AKQGLSCITGDNCKGVQQPEVDASL---    |
| WP_183879665.1 | MKKVNLNKNITLDKEIISKLNDDQLNELEGG  | -KAAGSMSCITLSNQSCVSNANCEEAAQQRLSL |
| WP_183879663.1 | MKKVNLSDRVQLDKEIISKLSEDQLSELEGG  | --AKQGLSCITGENSCKTVQSQDAADEAL--   |
| WP_183879661.1 | MKKVNLSDKVQLDKEIISKLSEDQLSELEGG  | --AKQGLSCITGDNCKTVKQDAVDDAL--     |
| WP_183879658.1 | MKKVNLSEKVQLDKEIISKLTEDQLSELEGG  | --AKQGLSCVTGNNSCKTVQPQEAEEAL--    |
| WP_183879656.1 | MKKVNLSEKVQLDKEIISKLSDDQLKELEGG  | -SGKGLSCIGGKDCVSKVSPQEEELS---     |
| WP_184623960.1 | MKKVNLSEKVQLDKEIISKLNDDQLKELEGG  | -AAEKELSCIGGNNSCASKTIEAES-----    |
| WP_184623961.1 | MKKVNLSEKVQLDKEIISKLNDDQLKELEGG  | -AAERELSCIGGNNSCASKTIEAES-----    |
| WP_184623962.1 | MKKVNLSEKVQLDKEIISKLSDDQLKELEGG  | -AAEREVSCVTGNNSCATKTIEAES-----    |
| WP_184623963.1 | MKKVNLSDRIQLDREIISKLNDDQLKELEGG  | --QTTSLSCITGTTSCVYQVPDES-----     |
| WP_184623964.1 | MKKVNLSEKVQLDKEIISKLNDDQLKELEGG  | -AAEREVSCITGNNSCAAQELSES-----     |
| WP_185816813.1 | MKKVTLADQLELSKEIVANLTDEQLQEIEGG  | -AAAAGISCITGSGSCSKTQAEAEELSE----  |
| WP_185816814.1 | MKKVSLADQLELSKEVIASLNDEQLQEIEGG  | -AAAAGISCITGSGSCSKTQAEAEELSE----  |
| WP_193419308.1 | MKKVNLSDKVQLDKEIISKLSEDQLKEIEGG  | --NAAEFSCVSD--SCKNNTKASLEEEELGG-  |
| WP_193419309.1 | MKKVKLLNKAQLEKEIISELSEDQLKEVQGG  | --NAIEFSCWAD--SCKGPVKEDQDITLGD--  |
| WP_168202517.1 | MKKVNLSEKVQLDKEIISKLSEDQLKEIEGG  | --NAAELSCWSD--SCKNNTKASLEEEFEGG-  |
| WP_168202518.1 | MKKVKLSNKVQLEKEIISELSEDQLKEVEGG  | --NAIEFSCWAD--SCNRPIKGEQDAISD--   |
| WP_183766852.1 | MKKVNLSEKVQLDKEIISKLSEDQLKEIEGG  | --NAAELSCWSD--SCKNNTKASVEEEIIGG-  |
| WP_154282287.1 | MKKVKLSNKVQLEKEIISELSEEQLKEVQGG  | --NATEFSCWLD--SCKGPMKEQDAIDD---   |
| WP_158797085.1 | MKKVNLSEKVQLDKEIISKLTTEEQLKQIEGG | --NAAELSCWSD--SCKNNSVEEAN-----    |
| WP_157811775.1 | MNKIKLTKGLQINKEVSKLQEDQMADVKGG   | ---KAALSCLWK--SCNGSKEDKLEA-----   |
| WP_157811776.1 | MKKIKLTKGLQINKEAVSKLQEDQMTEVKGG  | ---KAALSCLWK--SCNSSSEESIEA-----   |
| WP_157811777.1 | MKKIKLTKGLKINKEAISKLQEDQMTEVKGG  | ---KAALSCLWD--SCNGSSEEKLEL-----   |

**Figure S13:** Sequence alignment of lanthipeptide precursor peptides encoded in genomes of various Bacteroidetes. Peptide sequences were obtained by performing a BLAST analysis<sup>8</sup> with PedA15.1 as query followed by RODEO analysis<sup>9</sup> to assure nearby LanB, and LanC enzymes. Peptides containing a double-glycine motif at the end of the putative leader peptide, as well as a hydrophobic residue at -7 and -12 positions (grey) that are known recognition positions for LanT proteases were selected for alignment. All peptides contain a SCX<sub>n</sub>SC motif ( $n = 3-6$ ; yellow). Peptide sequences from different biosynthetic gene clusters are separated with an empty line.

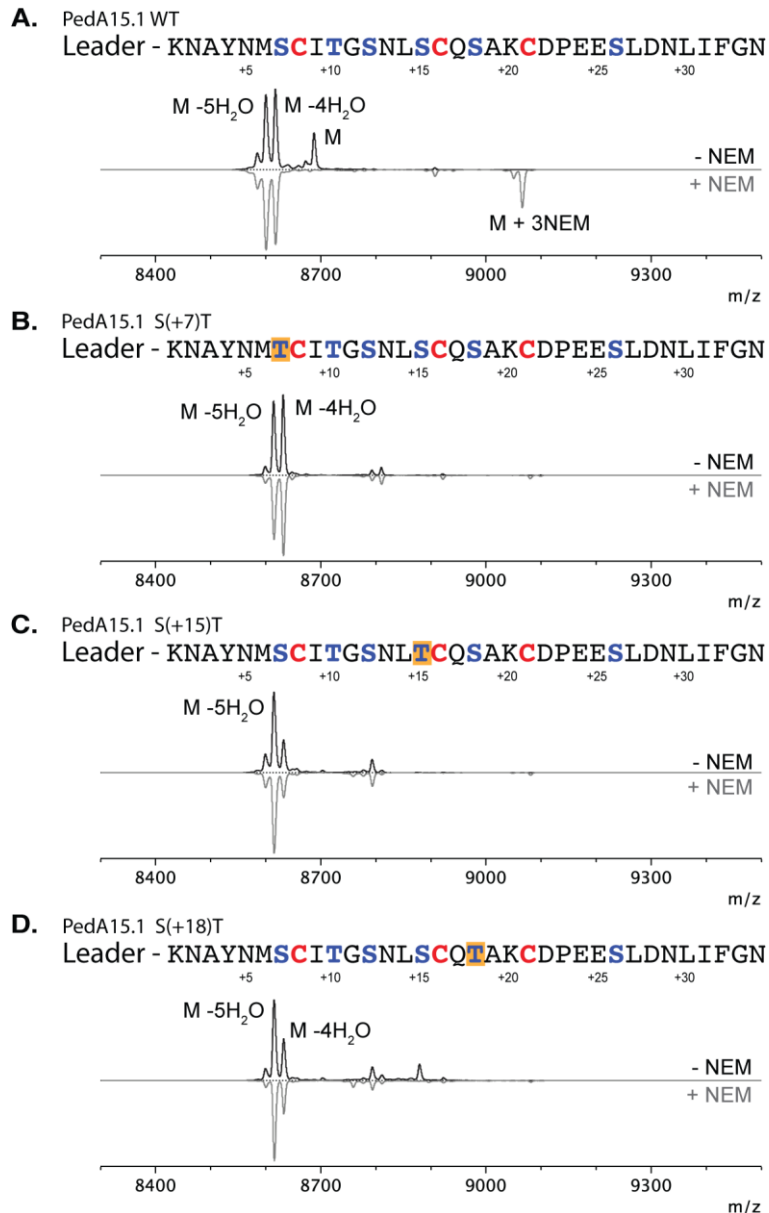

**Figure S14:** Ser-to-Thr His<sub>6</sub>-PedA15.1 variants co-expressed with PedB15, PedC15, and *P. lusitanus* tRNA<sup>Glu</sup>/GluRS in *E. coli*. Full-length purified peptides were analyzed by MALDI-TOF MS before (black) and after NEM alkylation (grey). (A) wild-type PedA15.1 contained a mixture of 4x dehydrated ([M+H] avg., m/z 8616.7 calc.; 8617.5 obs.) and 5x ([M+H] avg., m/z 8598.7 calc.; 8600.3 obs.) dehydrated product. (B) PedA15.1-S7T contained a mixture of 4x dehydrated ([M+H] avg., m/z 8630.7 calc.; 8631.7 obs.) and 5x ([M+H] avg., m/z 8612.7 calc.; 8614.4 obs.) dehydrated product. (C) PedA15.1-S15T contained predominantly 5x dehydrated ([M+H] avg., m/z 8612.7 calc.; 8614.9 obs.) product. (D) PedA15.1-S18T also contained predominantly 5x dehydrated ([M+H] avg., m/z 8612.7 calc.; 8614.7 obs.) product. All variants were fully cyclized as was evident by the lack of NEM adducts following NEM treatment. NEM, *N*-ethylmaleimide. Mutations are highlighted in orange.



PedA15.1 Trypsin: NAYNMS<sup>2</sup>CITG<sup>2</sup>SNL<sup>2</sup>SC<sup>2</sup>QSAK<sup>2</sup>CDPEESLDNLI<sup>2</sup>FGN

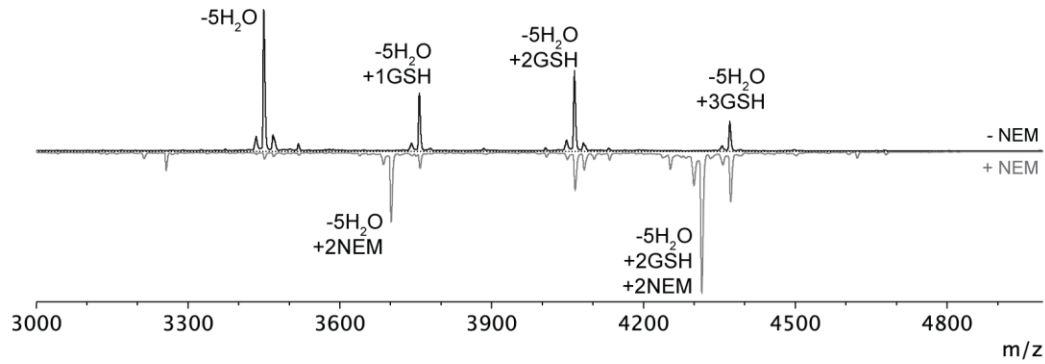

**Figure S15: MALDI-TOF MS analysis of PedA15.1 expressed in the absence of PedC15 followed by trypsin digestion & NEM alkylation.** Several glutathione (GSH) adducts are observed, as well as NEM adducts, indicating incomplete cyclization in the absence of PedC15. PedA15.1 – 5 H<sub>2</sub>O (M, avg. m/z 3449.8 calc.; 3450.0.3 obs.), PedA15.1 – 5 H<sub>2</sub>O + 2 NEM ([M+H], avg. m/z 3701.0 calc.; 3701.2 obs.), PedA15.1 – 5 H<sub>2</sub>O + GSH ([M+H], avg. m/z 3758.1 calc.; 3758.4 obs.), PedA15.1 – 5 H<sub>2</sub>O + 2 GSH ([M+H], avg. m/z 4064.4 calc.; 4064.8 obs.), PedA15.1 – 5 H<sub>2</sub>O + 3 GSH ([M+H], avg. m/z 4372.8 calc.; 4372.3 obs. PedA15.1 – 5 H<sub>2</sub>O + 2 GSH + 2NEM ([M+H], avg. m/z 4315.7 calc.; 4315.1 obs.).

PedA15.2 LahT150: GAHANNM**S**C**I**T**G****S**K**S**C**P**N**C**KEAEREDYN

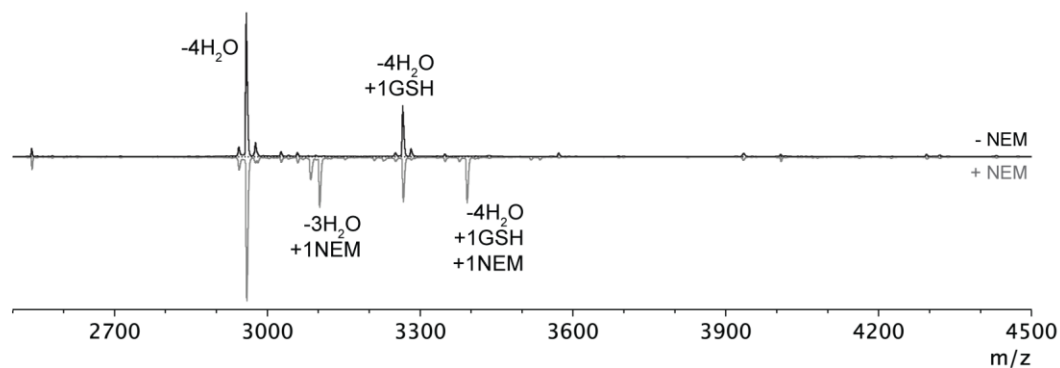

**Figure S16: MALDI-TOF MS analysis of PedA15.2 expressed in the absence of PedC15 followed by LahT150 digestion & NEM alkylation.** A glutathione (GSH) adduct is observed, as well as NEM adducts, indicating incomplete cyclization in the absence of PedC15. PedA15.2 – 4 H<sub>2</sub>O ([M+H], avg. m/z 2959.2 calc.; 2959.6 obs.), PedA15.2 – 3 H<sub>2</sub>O + NEM ([M+H], avg. m/z 3102.3 calc.; 3102.9 obs.), PedA15.2 – 4 H<sub>2</sub>O + GSH ([M+H], avg. m/z 3266.5 calc.; 3266.2 obs.), PedA15.2 – 4 H<sub>2</sub>O + 1 GSH +1 NEM ([M+H], avg. m/z 3391.6 calc.; 3392.1 obs.).

|                |                                                                                                                      |
|----------------|----------------------------------------------------------------------------------------------------------------------|
| NisC           | MGLAHGLAG <sub>[207]</sub> .....RDAWCYGG <sub>[287]</sub> .....YMICHGY <sub>[333]</sub> .....FLEGI <sub>[382]</sub>  |
| WP_125426353.1 | TGISHGSAM <sub>[203]</sub> .....NLCLLYGD <sub>[265]</sub> .....ASLWYGT <sub>[315]</sub> .....FNFGV <sub>[377]</sub>  |
| WP_184623966.1 | TGLSHGNGM <sub>[206]</sub> .....NHCIIVYGD <sub>[268]</sub> .....MSIKYGV <sub>[318]</sub> .....FSFGL <sub>[380]</sub> |
| WP_041881201.1 | TGLAHGNGM <sub>[207]</sub> .....NHCVVYGD <sub>[268]</sub> .....ASVKYGV <sub>[318]</sub> .....FGYGL <sub>[380]</sub>  |
| WP_184659139.1 | TGLAHGNAM <sub>[208]</sub> .....NHCVVYGD <sub>[269]</sub> .....ASIKYGV <sub>[319]</sub> .....FGYGL <sub>[381]</sub>  |
| WP_158797083.1 | TGLAHGNAM <sub>[201]</sub> .....NHCLVYGD <sub>[266]</sub> .....ASVKYGA <sub>[316]</sub> .....LNFGL <sub>[378]</sub>  |
| WP_154282285.1 | TGLAHGSAM <sub>[201]</sub> .....NHCLVYGD <sub>[266]</sub> .....ASVKYGV <sub>[316]</sub> .....LNFGL <sub>[378]</sub>  |
| WP_193419311.1 | TGLAHGVAM <sub>[201]</sub> .....NHCLVYGD <sub>[266]</sub> .....ASVKYGV <sub>[316]</sub> .....LNFGL <sub>[378]</sub>  |
| WP_147230291.1 | TGLAHGSAM <sub>[201]</sub> .....NHCLVYGD <sub>[266]</sub> .....ASVKYGV <sub>[316]</sub> .....LNFGL <sub>[378]</sub>  |
| WP_183766846.1 | FGFPHGYLS <sub>[201]</sub> .....NHCLVYGD <sub>[266]</sub> .....DSVKYGV <sub>[316]</sub> .....LNFGL <sub>[378]</sub>  |
| WP_100924802.1 | FGFPHGYLS <sub>[191]</sub> .....RLAWCNSD <sub>[266]</sub> .....HHFCHGS <sub>[312]</sub> .....LFY GK <sub>[365]</sub> |

**Figure S17:** Sequence alignment of lanthipeptide cyclases encoded in genomes of various Bacteroidetes. Sequence of cyclases obtained from the RODEO output that was used for generating Figure S13. Putative active site residues are highlighted based on previous structural and mutagenesis studies on the lantibiotic cyclase NisC:<sup>10, 11</sup> non-essential (gray), catalytic acid (yellow), and zinc-binding (cyan) residues. Nearly all orthologs of PedC15 lack zinc-binding ligands (except WP\_100924802.1).

## References

- (1) Gibson, D. G., Young, L., Chuang, R. Y., Venter, J. C., Hutchison, C. A., 3rd, and Smith, H. O. (2009) Enzymatic assembly of DNA molecules up to several hundred kilobases, *Nat. Methods* 6, 343-345.
- (2) Caetano, T., Krawczyk, J. M., Mosker, E., Süßmuth, R. D., and Mendo, S. (2011) Heterologous expression, biosynthesis, and mutagenesis of type II lantibiotics from *Bacillus licheniformis* in *Escherichia coli*, *Chem. Biol.* 18, 90-100.
- (3) Bobeica, S. C., Dong, S. H., Huo, L., Mazo, N., McLaughlin, M. I., Jimenez-Oses, G., Nair, S. K., and van der Donk, W. A. (2019) Insights into AMS/PCAT transporters from biochemical and structural characterization of a double glycine motif protease, *eLife* 8, e42305.
- (4) Strohmalm, M., Hassman, M., Košata, B., and Kodíček, M. (2008) mMass data miner: an open source alternative for mass spectrometric data analysis, *Rapid Commun. Mass Spec.* 22, 905-908.
- (5) Thibodeaux, C. J., Ha, T., and van der Donk, W. A. (2014) A price to pay for relaxed substrate specificity: a comparative kinetic analysis of the class II lanthipeptide synthetases ProcM and HalM2, *J. Am. Chem. Soc.* 136, 17513-17529.
- (6) Liu, W., Chan, A. S. H., Liu, H., Cochrane, S. A., and Vederas, J. C. (2011) Solid supported chemical syntheses of both components of the lantibiotic lacticin 3147, *J. Am. Chem. Soc.* 133, 14216-14219.
- (7) Bobeica, S. C., Zhu, L., Acedo, J. Z., Tang, W., and van der Donk, W. A. (2020) Structural determinants of macrocyclization in substrate-controlled lanthipeptide biosynthetic pathways, *Chem. Sci.* 11, 12854-12870.
- (8) Altschul, S. F., Gish, W., Miller, W., Myers, E. W., and Lipman, D. J. (1990) Basic local alignment search tool, *J. Mol. Biol.* 215, 403-410.
- (9) Tietz, J. I., Schwalen, C. J., Patel, P. S., Maxson, T., Blair, P. M., Tai, H. C., Zakai, U. I., and Mitchell, D. A. (2017) A new genome-mining tool redefines the lasso peptide biosynthetic landscape, *Nat. Chem. Biol.* 13, 470-478.

- (10) Li, B., and van der Donk, W. A. (2007) Identification of essential catalytic residues of the cyclase NisC involved in the biosynthesis of nisin, *J. Biol. Chem.* *282*, 21169-21175.
- (11) Yang, X., and van der Donk, W. A. (2015) Michael-type cyclizations in lantibiotic biosynthesis are reversible, *ACS Chem. Biol.* *10*, 1234-1238.
